# Supplementary material for: Impact of Organic Loading Rate in Volatile Fatty Acids Production and Population Dynamics Using Microalgae Biomass as Substrate
Source: PubMed Central journal article supplement (PMC6895168; doi:10.1038/s41598-019-54914-4), 2019-12-05
Supplement: 41598_2019_54914_MOESM1_ESM.pdf [file 41598_2019_54914_MOESM1_ESM.pdf]

**IMPACT OF ORGANIC LOADING RATE IN VOLATILE FATTY ACIDS  
PRODUCTION AND POPULATION DYNAMICS USING MICROALGAE  
BIOMASS AS SUBSTRATE**

Jose Antonio Magdalena<sup>1</sup>, Silvia Greses<sup>1</sup>, Cristina González-Fernández<sup>1\*</sup>

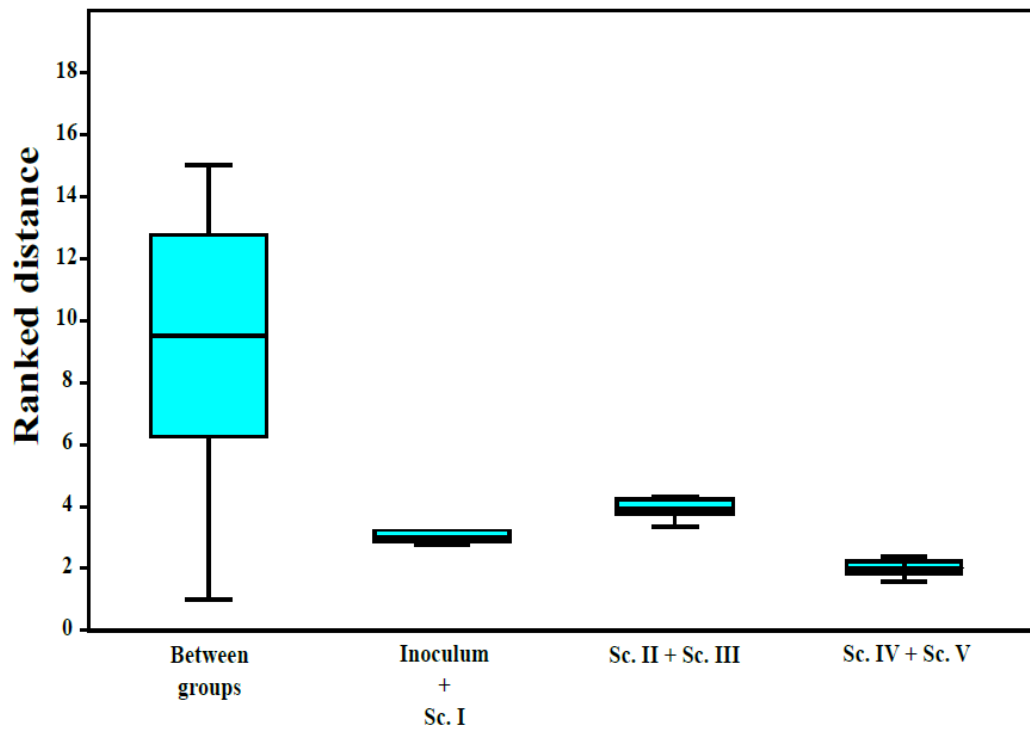

Figure S1. ANOSIM test carried out for the different scenarios

Table S1. R values of ANOSIM test:

|                  | Inoculum +Sc. I | Sc. II + Sc. III | Sc. IV + Sc V |
|------------------|-----------------|------------------|---------------|
| Inoculum +Sc. I  | -               | 0.5              | 1             |
| Sc. II + Sc. III | 0.5             | -                | 1             |
| Sc. IV + Sc V    | 1               | 1                | -             |
